# Supplementary material for: Competitive 13C and 18O kinetic isotope effects on CO2 reduction catalyzed by Re(bpy)(CO)3Cl
Source: Royal Society of Chemistry journal article supplement (doi:10.1039/c4dt03977g), 2015-01-01
Supplement: c4dt03977g1.pdf [file c4dt03977g1.pdf]

**Supporting Information for**

**Competitive  $^{13}\text{C}$  and  $^{18}\text{O}$  Kinetic Isotope Effects of  
 $\text{Re}(\text{bpy})(\text{CO})_3\text{Cl}$ -Catalyzed  $\text{CO}_2$  Reduction**

Taylor Schneider and Alfredo M. Angeles-Boza \*

| Table of contents                                                                                                                                                                 | Page # |
|-----------------------------------------------------------------------------------------------------------------------------------------------------------------------------------|--------|
| Experimental Section                                                                                                                                                              | S-3    |
| <b>Figure S1:</b> FT-IR spectrum of reaction mixture produced by $\text{Re}(\text{bpy})(\text{CO})_3\text{Cl}$ ( <b>1</b> ) and $\text{Na}(\text{Hg})$ in acetonitrile.           | S-5    |
| <b>Figure S2:</b> FT-IR spectrum of reaction mixture produced during the photocatalytic reduction of $\text{CO}_2$ by $\text{Re}(\text{bpy})(\text{CO})_3\text{Cl}$ ( <b>1</b> ). | S-6    |
| <b>Figure S3:</b> Schematic diagram of apparatus used for the measurement of competitive $^{13}\text{C}$ and $^{18}\text{O}$ isotope effects                                      | S-7    |
| Computational methods                                                                                                                                                             | S-7    |
| Calculation of EIEs                                                                                                                                                               | S-8    |
| Calculated vibrational frequencies                                                                                                                                                | S-9    |
| References                                                                                                                                                                        | S-11   |

## Experimental Section

**General Procedures.**  $^1\text{H}$  NMR spectra were recorded on a Bruker AVANCE III (400 MHz) system at ambient temperature and were referenced to residual solvent peaks. Elemental analyses were performed at Atlantic Microlab, Inc., in Norcross, GA.

**Materials.** 2,2'-bipyridine, pentacarbonylchlororhenium (I), triethanolamine and Na(Hg) amalgam (5% Na by mass) were all purchased from Sigma-Aldrich and used as received. Solvents used in this work were purified by passing through a solvent purification system (Glass Contour).

**Na(Hg)-Driven Reaction.** Collection of gas for  $^{13}\text{C}$ O and  $^{18}\text{O}$  KIE analysis required the design of a special apparatus (Figure S2). A 0.5-2mM solution of (**1**) was added to the graduated solvent reservoir, and saturated with 1%  $\text{CO}_2$ , backed with  $\text{N}_2$ . The Na-Hg pellets were added to the lower chamber of the two-bulb component, and the apparatus, from the right of valve 1, onwards, was evacuated down to approximately 0.2 torr. Valves 3 and 4 were then closed, and a 20 mL portion of the catalyst solution was injected into the lower chamber by opening valve 1. The resulting reaction mixture was stirred for varying amounts of time (70 – 300 minutes). Once the reaction has run for the desired length of time, solvent trap A was immersed in a bath of liquid nitrogen. Valve 5 was closed, and valves 4 and 3 were opened, in that order. The reaction mixture would start to bubble as the sudden vacuum would cause it to outgas. A mixture of gases and  $\text{CH}_3\text{CN}$  solvent were collected in trap A. Valve 3 was closed after 2.5 minutes of constant outgassing from the reaction mixture. Valve 4 was left open for an additional five minutes. Valve 4 was then closed, and the liquid nitrogen was removed from trap A. The frozen solvent was given time to melt and collect at the bottom of the trap. Trap B was then immersed in liquid nitrogen, and valve 6 was closed. Trap A was then immersed in a cold bath of isopropanol/dry ice. This will keep the solvent frozen, but allow the gas to transfer over into trap B. Valve 5 was opened for ten minutes. Valves 4 and 6 were then also opened, to evacuate the  $\text{N}_2$  and  $\text{CO}$ . The dry ice is cold enough that it keeps the  $\text{CO}_2$  frozen, even at such low pressures. The same is true for the ability of the isopropanol/dry ice bath to retain the frozen solvent. Once the pressure of the system had dropped back down to 0.2 torr, valves 5 and 6 were closed. (NOTE: if there is enough solvent in trap A to completely block the system, then some solvent must first be transferred over to trap B, in the same manner by which solvent was transferred from the two-

bulb component to trap A. This solvent will then be allowed to thaw, and flow to the bottom of trap B before immersing traps A and B in isopropanol/dry ice and liquid nitrogen, respectively.) The liquid nitrogen bath over trap B was replaced with the isopropanol/dry ice bath. The bottom one-third of trap C was immersed in liquid nitrogen (approximately at marking *i*). Valves 8 and 9 were closed, and then valve 6 was opened. The pressure initially increased, but quickly declined as the CO<sub>2</sub> condensed in trap C. After ten minutes the pressure would have leveled off around 0.3 torr. The level of liquid nitrogen was then increased so that at least two-thirds of trap C was immersed (approximately marking *ii*). Valve 7 was closed. Valve 9 was opened to evacuate any uncondensed gasses, such as N<sub>2</sub> or CO. The liquid nitrogen is cold enough that the CO<sub>2</sub> in trap C will not evaporate, even at these low pressures. Valve 9 was closed, and the pressure, almost always around 0.2 torr, was recorded as P<sub>low</sub>. The liquid nitrogen was removed from trap C, and the pressure increased as the CO<sub>2</sub> sublimated into gas. After a few minutes, the pressure leveled off, and this was recorded as P<sub>high</sub>. The difference between P<sub>high</sub> and P<sub>low</sub> should be P<sub>CO<sub>2</sub></sub>. (NOTE: The CO<sub>2</sub> pressure measured when no reaction occurs should be calculated based on the ideal gas law and the volume of this segment of the apparatus, and then measured experimentally. The measured pressure, P<sub>CO<sub>2</sub></sub>, should be lower than the pressure of no reaction. If it is higher, then the other gases that might be present are either N<sub>2</sub>, CO, or solvent vapor, or there is a leak.) After P<sub>CO<sub>2</sub></sub> had been measured, the removable tube, labeled as trap D, was immersed in liquid nitrogen, and valve 8 was opened. The liquid nitrogen level sometimes needs to be adjusted to encourage complete selection of CO<sub>2</sub>. Once all CO<sub>2</sub> had been collected, the liquid nitrogen level was raised slightly, and valve 9 was opened briefly. Valve 8 was then closed, and a propane blow torch was used to seal the tube 10 cm up from the bottom. The liquid nitrogen was removed, and the torch was used to completely remove the 10 cm segment from the rest of the apparatus.

Formation of oxalate, carbonate and formate was not observed during these reactions. The oxalate formation was monitored using a commercial oxalate kit from Trinity Biotech (591D-1KT). The Na(Hg) pellets were first removed from the reaction flask under inert atmosphere. The remaining solution was rotary evaporated and the remaining solid was suspended in water (5 mL). The protocol detailed in the kit was then followed. We did not see evidence of oxalate, carbonate and formate formation through FT-IR (Figure S1).<sup>1</sup>

**Figure S1:** FT-IR spectrum of reaction mixture produced by  $\text{Re}(\text{bpy})(\text{CO})_3\text{Cl}$  (**1**) and  $\text{Na}(\text{Hg})$  in acetonitrile.

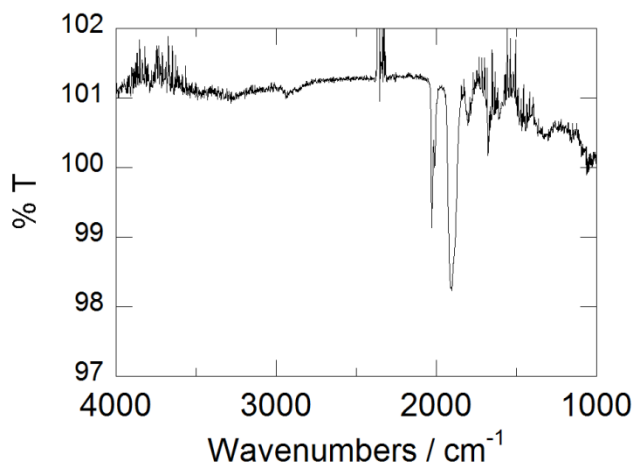

**Photochemistry.** The photochemistry was performed in a solution that was five parts acetonitrile to one part triethanolamine (TEOA). The catalyst concentration was ranged from 0.5 mM to 2 mM, depending on the individual reactions. The same reaction vessel used in the  $\text{Na}(\text{Hg})$ -driven reductions was used here. A 20mL portion of the solution was introduced to the lower portion of the bulb after saturating the solution with the 1%  $\text{CO}_2$  gas mixture. The vessel was then removed from the manifold setup, and photolysis initiated using a 150-W Hg/Xe lamp equipped with a dichroic mirror and a band-pass filter (350 - 450 nm). The reaction times for the photochemical experiments were much longer than those involving the  $\text{Na}(\text{Hg})$  amalgam, and were between 16 and 72 hours to obtain a range of  $\text{CO}_2$  conversions. Once these reactions were performed, the reaction vessel was re-attached to the KIE manifold, and the remaining  $\text{CO}_2$  was collected in a method identical to that described above.

**Figure S2:** FT-IR spectrum of reaction mixture produced during the photocatalytic reduction of CO<sub>2</sub> by Re(bpy)(CO)<sub>3</sub>Cl (**1**). Spectrum is dominated by the TEOA peaks.

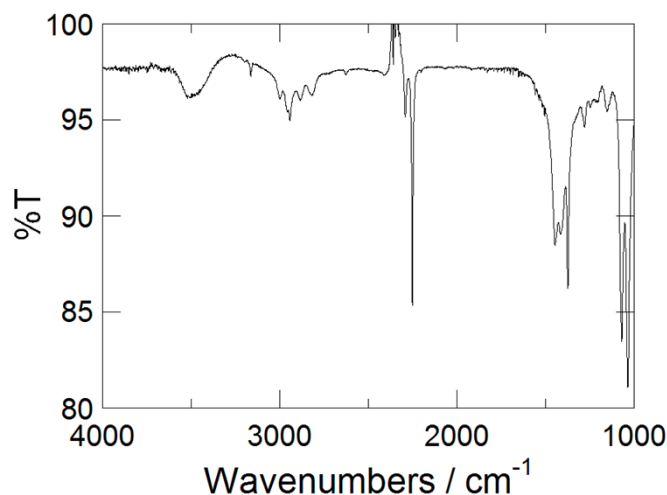

**Synthesis.** Re(bpy)(CO)<sub>3</sub>Cl was prepared according to previously reported methods. Three different batches were prepared for the current experiments. Briefly, in a 100 mL round bottom flask, Re(CO)<sub>5</sub>Cl (0.502g, 1.35 mmol), 2,2'-bipyridine (0.0211g, 1.35 mmol) and toluene (50 mL) were added together and the resultant reaction mixture was heated under refluxing conditions. After 5 hours, the product was vacuum filtered, and rinsed with cold toluene. Yield 0.40 g (65 %). <sup>1</sup>H NMR (δ, 400 MHz, DMSO-*d*<sub>6</sub>): 9.02 (d, 1H), 8.77 (d, 1H), 8.34(t, 1H), 7.76(t, 1H). FT-IR (acetonitrile): 2022 (vs), 1917 (s), 1900 (s).<sup>2</sup> Anal. Found for C<sub>13</sub>H<sub>8</sub>N<sub>2</sub>O<sub>3</sub>ClRe: C, 40.30; H, 2.05; N, 5.76. Calcd. C, 40.47; H, 1.75; N, 6.06.

**Figure S3.** Schematic diagram of apparatus used for the measurement of competitive  $^{13}\text{C}$  and  $^{18}\text{O}$  isotope effects. Valves 1-3 are ground glass stopcocks coated in APIEZON® H-Grease to provide an adequate seal at high vacuum. Valves 4-9 are Teflon screw-cap valves. The various segments are connected by Swagelok® Ultra-Torr straight fittings.

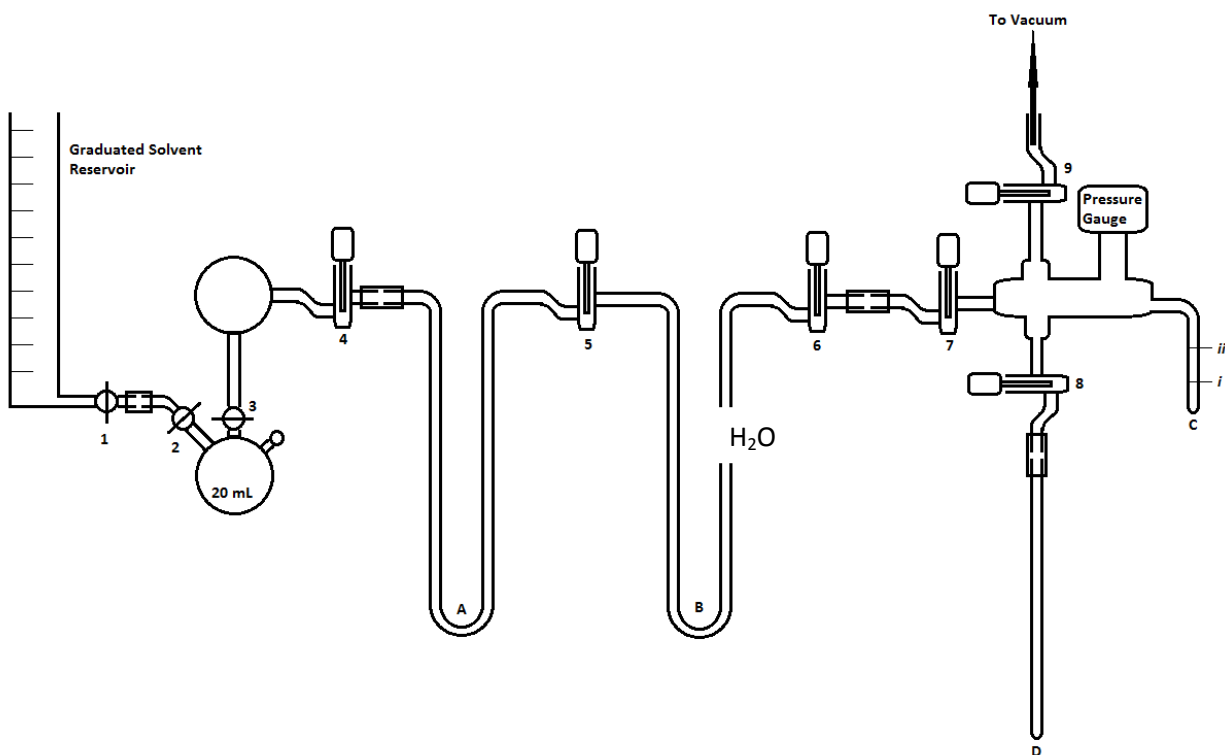

### Computational Methods.

All geometries were fully-optimized at three levels of DFT. One approach employed the previously validated *m*PW functional, 6-311G(d) basis set for O and C, and 6-31G for H. Calculations were carried out using the Gaussian09 package.<sup>3</sup> The second approach employed the BP86 functional, along with the 6-311G(d) basis set for the O and C atoms, and the 6-31G basis set for the H atom. The third approach used the B3LYP functional with 6-311G(d) basis set for O and C, and 6-31G for H. The vibrations were calculated after all the geometries were fully optimized using the *m*PWPW91, BP86 and B3LYP functionals, and 6-311G(d) basis set for O and C, and 6-31G basis set for H.

## Calculations of $^{18}\text{O}$ EIEs

The complete set of vibrational frequencies was implemented for the initial (A) and final (B) states per the Redlich-Teller product rule, using the generic isotope exchange equation  $\text{A} + \text{B}^* \rightarrow \text{A}^* + \text{B}$ , where the asterisk designated the site of the heavy isotope. A is the initial reactant and B is the product, both with  $3N-6$  stable modes, where  $N$  is the number of atoms. The product with  $3N-6$  vibrations was used to calculate  $^{18}\text{O}$  EIEs, where additional terms include  $h$  (Planck's constant),  $k$  (Boltzmann's constant) and  $T$  is temperature.

$$(S-1) \quad {}^{18}\text{O EIE} = ZPE \times EXC \times MMI$$

$$(S-2) \quad ZPE = \frac{\left[ \prod_j^{3N-6} \frac{\exp(h\nu_j^{B^*}/(2kT))}{\exp(h\nu_j^B/(2kT))} \right]}{\left[ \prod_i^{3N-6} \frac{\exp(h\nu_i^{A^*}/(2kT))}{\exp(h\nu_i^A/(2kT))} \right]}$$

$$(S-3) \quad EXC = \frac{\left[ \prod_j^{3N-6} \frac{1 - \exp\{-(h\nu_j^{B^*}/(kT))\}}{1 - \exp\{-(h\nu_j^B/(kT))\}} \right]}{\left[ \prod_i^{3N-6} \frac{1 - \exp\{-(h\nu_i^{A^*}/(kT))\}}{1 - \exp\{-(h\nu_i^A/(kT))\}} \right]}$$

$$(S-4) \quad MMI = \frac{\prod_j^{3N-6} (v_j^B / v_j^{B^*})}{\prod_i^{3N-6} (v_i^A / v_i^{A^*})}$$

### Calculated Vibrational Frequencies used for the calculation of EIEs

#### CO<sub>2</sub> (B3LYP)

| 12, 16, 16 | 13, 16, 16 | 12,16,18  |
|------------|------------|-----------|
| 666.4978   | 647.5285   | 661.4171  |
| 1375.6153  | 1375.6155  | 1335.8974 |
| 2436.0748  | 2366.7412  | 2417.9884 |

#### CO<sub>2</sub> (*m*PWPW91)

| 12, 16, 16 | 13, 16, 16 | 12,16,18  |
|------------|------------|-----------|
| 639.996    | 621.7809   | 635.1172  |
| 1324.725   | 1324.7252  | 1286.4877 |
| 2383.0274  | 2315.2036  | 2365.3141 |

#### CO<sub>2</sub> (BP86)

| 12, 16, 16 | 13, 16, 16 | 12,16,18  |
|------------|------------|-----------|
| 637.94     | 619.7835   | 633.0769  |
| 1318.4081  | 1318.4083  | 1280.353  |
| 2371.4039  | 2303.911   | 2353.7772 |

#### CO<sub>2</sub><sup>-</sup> (B3LYP)

| 12, 16, 16 | 13, 16, 16 | 12,16,18  |
|------------|------------|-----------|
| 740.676    | 730.4338   | 726.5864  |
| 1330.6272  | 1310.8833  | 1306.8291 |
| 1689.4177  | 1643.6106  | 1675.772  |

#### CO<sub>2</sub><sup>-</sup> (*m*PWPW91)

| <b>12, 16, 16</b> | <b>13, 16, 16</b> | <b>12,16,18</b> |
|-------------------|-------------------|-----------------|
| 711.1664          | 701.3869          | 697.6004        |
| 1280.5233         | 1261.4247         | 1257.718        |
| 1641.054          | 1596.5933         | 1627.737        |

**CO<sub>2</sub>** (BP86)

| <b>12, 16, 16</b> | <b>13, 16, 16</b> | <b>12,16,18</b> |
|-------------------|-------------------|-----------------|
| 708.2547          | 698.5356          | 694.7283        |
| 1273.1744         | 1254.1489         | 1250.5257       |
| 1629.82           | 1585.6685         | 1616.5945       |

**H<sub>2</sub>O** (B3LYP)

| <b>16</b> | <b>18</b> |
|-----------|-----------|
| 1691.9171 | 1684.7397 |
| 3733.4812 | 3725.9513 |
| 3853.4465 | 3837.4963 |

**H<sub>2</sub>O** (*m*PWPW91)

| <b>16</b> | <b>18</b> |
|-----------|-----------|
| 1672.7234 | 1665.6595 |
| 3648.8881 | 3641.4586 |
| 3774.3366 | 3758.8977 |

**H<sub>2</sub>O** (BP86)

| <b>16</b> | <b>18</b> |
|-----------|-----------|
| 1666.1381 | 1659.0897 |
| 3631.9207 | 3624.5526 |
| 3758.2484 | 3742.8681 |

**CO (B3LYP)**

| 12, 16    | 13, 16    | 12, 18    |
|-----------|-----------|-----------|
| 2220.5599 | 2171.0604 | 2166.9172 |

**CO (mPWPW91)**

| 12, 16    | 13, 16    | 12, 18   |
|-----------|-----------|----------|
| 2134.1072 | 2086.5349 | 2082.553 |

**CO (BP86)**

| 12, 16   | 13, 16    | 12, 18    |
|----------|-----------|-----------|
| 2124.681 | 2077.3188 | 2073.3545 |

**References**

1. Spectrum was compared to the FT-IR spectra compiled by NIST. Oxalate: <http://webbook.nist.gov/cgi/cbook.cgi?ID=C62760&Type=IR-SPEC&Index=2#IR-SPEC>; carbonate: <http://webbook.nist.gov/cgi/cbook.cgi?ID=C497198&Type=IR-SPEC&Index=1#IR-SPEC>; and formate: <http://webbook.nist.gov/cgi/cbook.cgi?Formula=HCOONa&NoIon=on&Units=SI&cIR=on>.
2. Values agree with those reported for  $\text{Re}(\text{bpy})(\text{CO})_3\text{Cl}$ . See for example: Smieja, J. M.; Kubiak, C. P. *Inorg. Chem.* **2010**, *49*, 9283-9289.
3. Gaussian 03, Revision C.02, Frisch, M. J.; Trucks, G. W.; Schlegel, H. B.; Scuseria, G. E.; Robb, M. A.; Cheeseman, J. R.; Montgomery, Jr., J. A.; Vreven, T.; Kudin, K. N.; Burant, J. C.; Millam, J. M.; Iyengar, S. S.; Tomasi, J.; Barone, V.; Mennucci, B.; Cossi, M.; Scalmani, G.; Rega, N.; Petersson, G. A.; Nakatsuji, H.; Hada, M.; Ehara, M.; Toyota, K.; Fukuda, R.; Hasegawa, J.; Ishida, M.; Nakajima, T.; Honda, Y.; Kitao, O.; Nakai, H.; Klene, M.; Li, X.; Knox, J. E.; Hratchian, H. P.; Cross, J. B.; Adamo, C.; Jaramillo, J.; Gomperts, R.; Stratmann, R. E.; Yazyev, O.; Austin, A. J.; Cammi, R.; Pomelli, C.; Ochterski, J. W.; Ayala, P. Y.; Morokuma, K.; Voth, G. A.; Salvador, P.;

Dannenberg, J. J.; Zakrzewski, V. G.; Dapprich, S.; Daniels, A. D.; Strain, M. C.; Farkas, O.; Malick, D. K.; Rabuck, A. D.; Raghavachari, K.; Foresman, J. B.; Ortiz, J. V.; Cui, Q.; Baboul, A. G.; Clifford, S.; Cioslowski, J.; Stefanov, B. B.; Liu, G.; Liashenko, A.; Piskorz, P.; Komaromi, I.; Martin, R. L.; Fox, D. J.; Keith, T.; Al-Laham, M. A.; Peng, C. Y.; Nanayakkara, A.; Challacombe, M.; Gill, P. M. W.; Johnson, B.; Chen, W.; Wong, M. W.; Gonzalez, C.; Pople, J. A. Gaussian, Inc., Wallingford CT, 2004
